# Supplementary material
Source: PubMed Central journal article supplement (PMC10330279)
Supplement: NIHMS1892255-supplement-1.pdf [file NIHMS1892255-supplement-1.pdf]

**Fig. S1: Confirmation of CCL5 knockout clones**

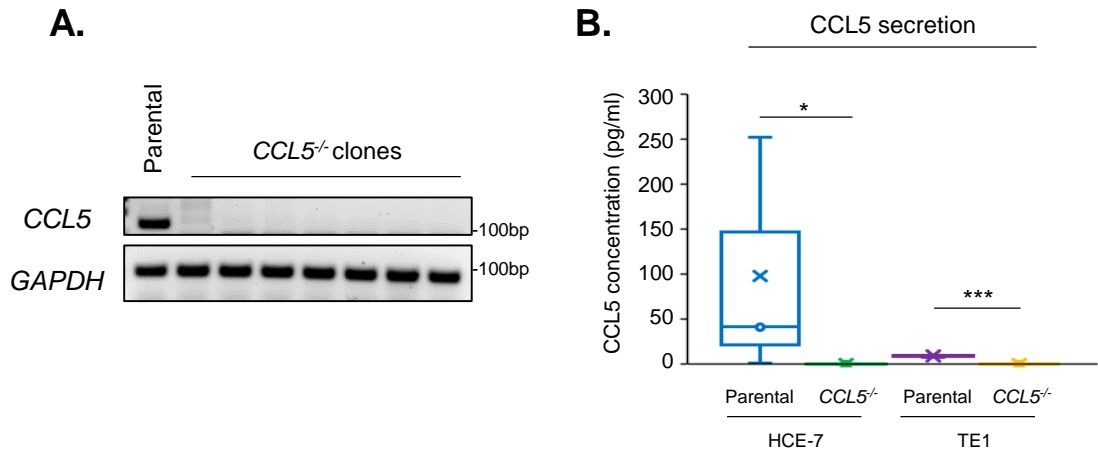

**C. CCL5 Protein coding DNA sequencing alignment**

|                     |     |                                                    |     |
|---------------------|-----|----------------------------------------------------|-----|
| Parental            | 1   | ATGAAGGTCTCCGCGGCAGCCCTCGCTGTCATCCTCATTGCTACTGCCCT | 50  |
| CCL5 <sup>-/-</sup> | 1   | ATGAAGGTCTCCGCGGCAGCCCTCGCTGTCATCCTCATTGCTACTGCCCT | 50  |
| Parental            | 51  | CTGCGCTCCTGCATCTGCCTCCCCATATTCCTCGGACACCACACCCTGCT | 100 |
| CCL5 <sup>-/-</sup> | 51  | CTGCGCTCCTGCATCTGCCTCCCCATAT                       | 78  |
| Parental            | 101 | GCTTTGCCTACATTGCCCGCCCACTGCCCGTGCCACATCAAGGAGTAT   | 150 |
| CCL5 <sup>-/-</sup> | 79  | -----                                              | 78  |
| Parental            | 151 | TTCTACACCAGTGGCAAGTGCTCCAACCCAGCAGTCGCTTTGTACCCCG  | 200 |
| CCL5 <sup>-/-</sup> | 79  | -----CAGCAGTCGCTTTGTACCCCG                         | 100 |
| Parental            | 201 | AAAGAACCGCCAAGTGTGTGCCAACCCAGAGAAGAAATGGGTTCGGGAGT | 250 |
| CCL5 <sup>-/-</sup> | 101 | AAAGAACCGCCAAGTGTGTGCCAACCCAGAGAAGAAATGGGTTCGGGAGT | 150 |
| Parental            | 251 | ACATCAACTCTTTGGAGATGAGCTAG                         | 276 |
| CCL5 <sup>-/-</sup> | 151 | ACATCAACTCTTTGGAGATGAGCTAG                         | 176 |

**D. CCL5 Protein amino acid alignment**

|                     |    |                                                     |    |
|---------------------|----|-----------------------------------------------------|----|
| Parental            | 1  | MKVSAAALAVILIATALCAPASASPYSSDTPCCFAYIARPLPRAHIKEYFY | 50 |
| CCL5 <sup>-/-</sup> | 1  | MKVSAAALAVILIATALCAPASASPYQSSLSPERTAKCVPTQRRNGFGS   | 50 |
| Parental            | 51 | TSGKCSNPAVVFVTRKNRQVCANPEKKWVREYINSLEMS*            | 91 |
| CCL5 <sup>-/-</sup> | 51 | TSTLWR*                                             | 56 |
