# Supplementary material
Source: PubMed Central journal article supplement (PMC10330279)

**Fig. S4:** Targeted CCR5 inhibition replicates CCL5 loss with reduced tumor cell proliferation *in vitro* and *in vivo*

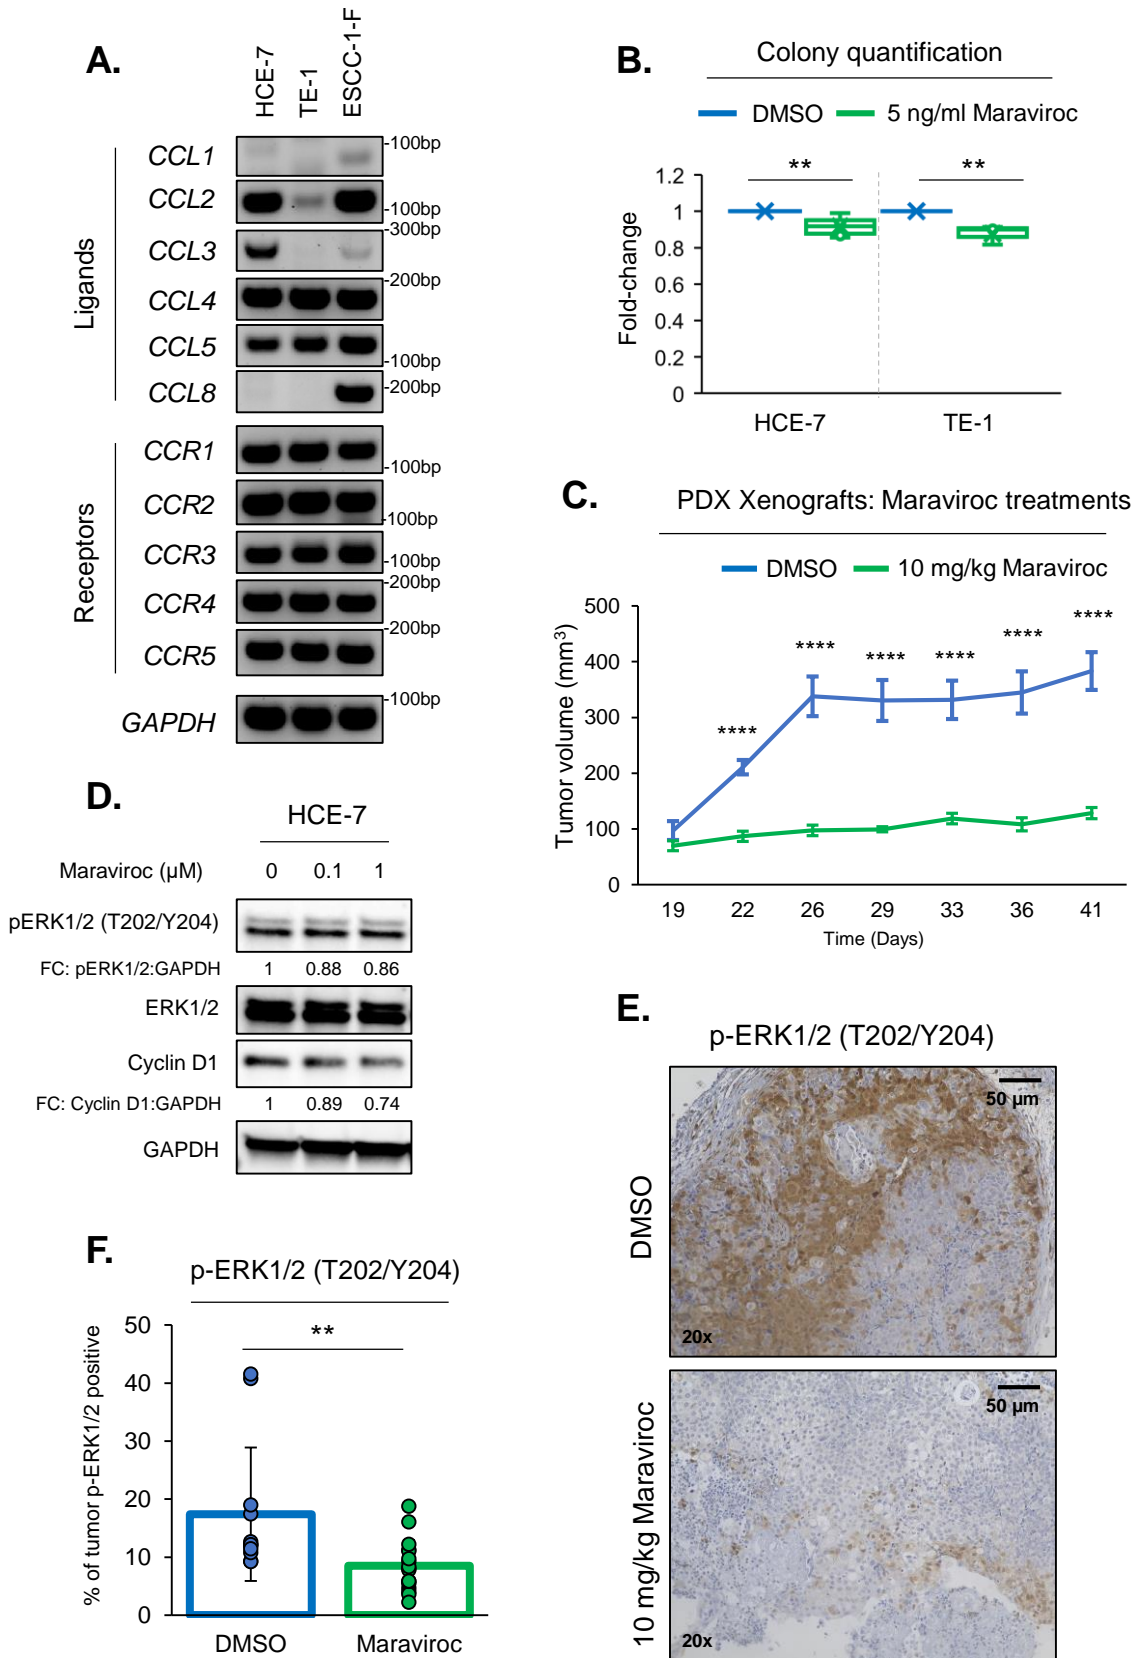

Supplement: NIHMS1892255-supplement-4.pdf [file NIHMS1892255-supplement-4.pdf]
