# Supplementary material
Source: PubMed Central journal article supplement (PMC10330279)

**Fig. S2:** Loss of tumor-derived CCL5 reduces tumor cell proliferation in TE-1 cells

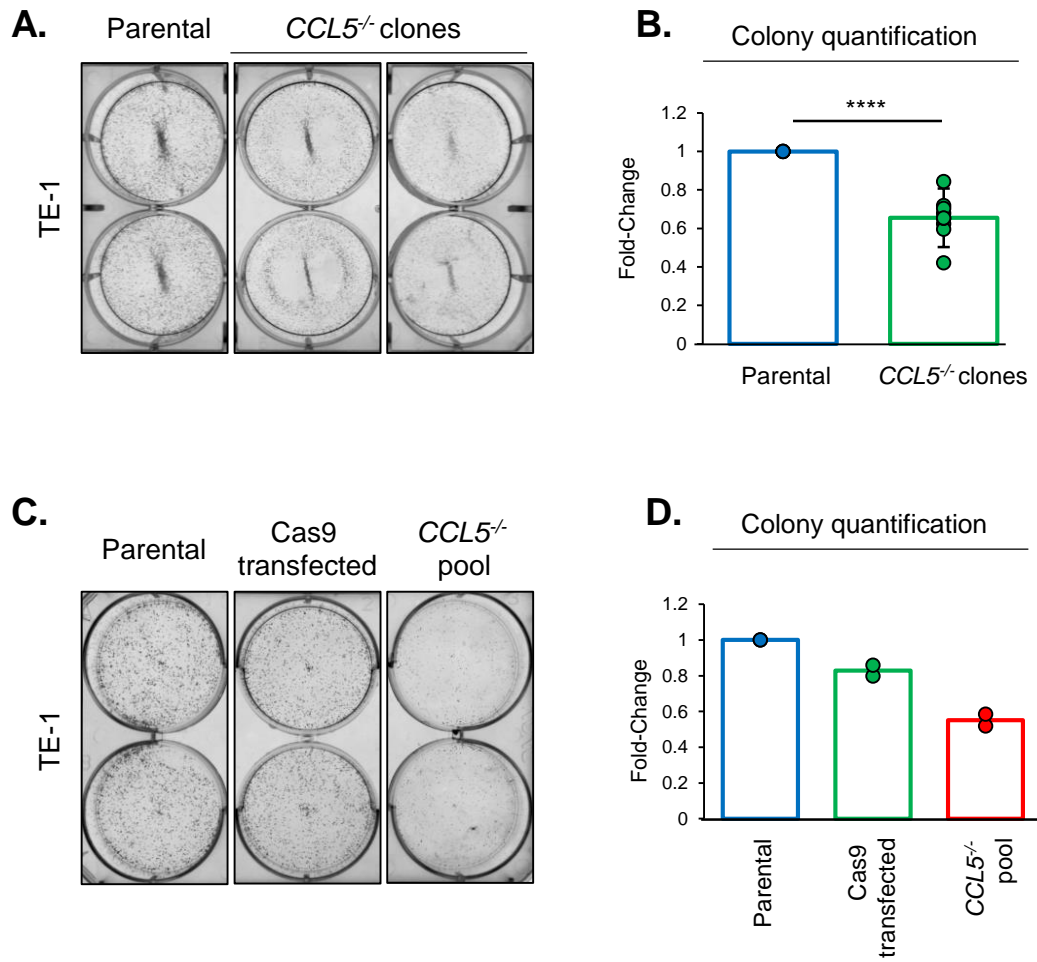

Supplement: NIHMS1892255-supplement-2.pdf [file NIHMS1892255-supplement-2.pdf]

**Fig. S3: ERK1/2 signaling pathway in CCL5 knockout cells**

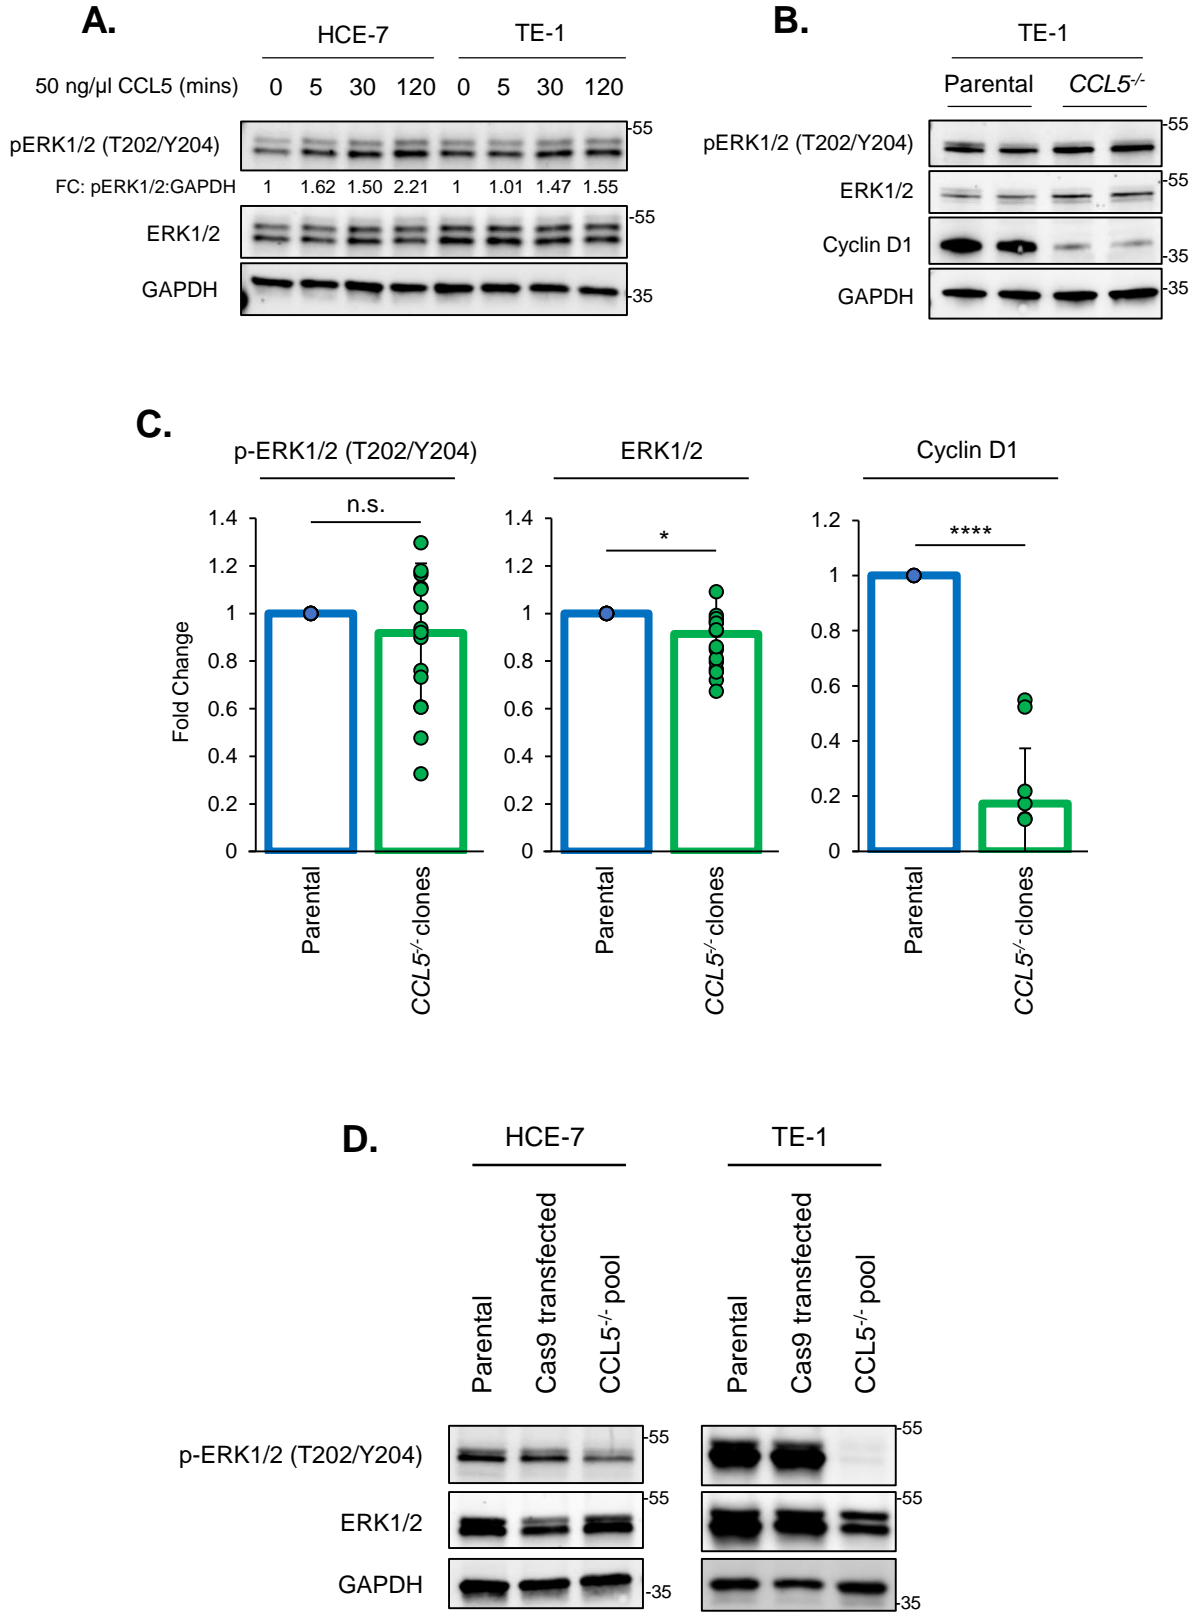

Supplement: NIHMS1892255-supplement-3.pdf [file NIHMS1892255-supplement-3.pdf]
